# Supplementary material for: Ground and excited state properties of furanoflavylium derivatives
Source: Royal Society of Chemistry journal article supplement (doi:10.1039/c9cp04917g), 2019-01-01
Supplement: c9cp04917g1.pdf [file c9cp04917g1.pdf]

## SUPPORTING INFORMATION

### **Ground and Excited State Properties of Furanoflavylum Derivatives. The Effect of the Furano Bridge.**

Alfonso Alejo-Armijo,<sup>1</sup> Nuno Basílio,<sup>1</sup> Adilson A. Freitas,<sup>2</sup> António L. Maçanita,<sup>2</sup> João C. Lima, <sup>1</sup>A. Jorge Parola,<sup>1</sup> Fernando Pina.<sup>1</sup>

<sup>1</sup> LAQV- REQUIMTE, Departamento de Química, Faculdade de Ciências e Tecnologia, Universidade NOVA de Lisboa, 2829-516, Caparica, Portugal

<sup>2</sup> Centro de Química Estrutural, Instituto Superior Técnico, Universidade de Lisboa, Av. Rovisco Pais,1, Lisboa 1048-001, Portugal

## NMR spectra

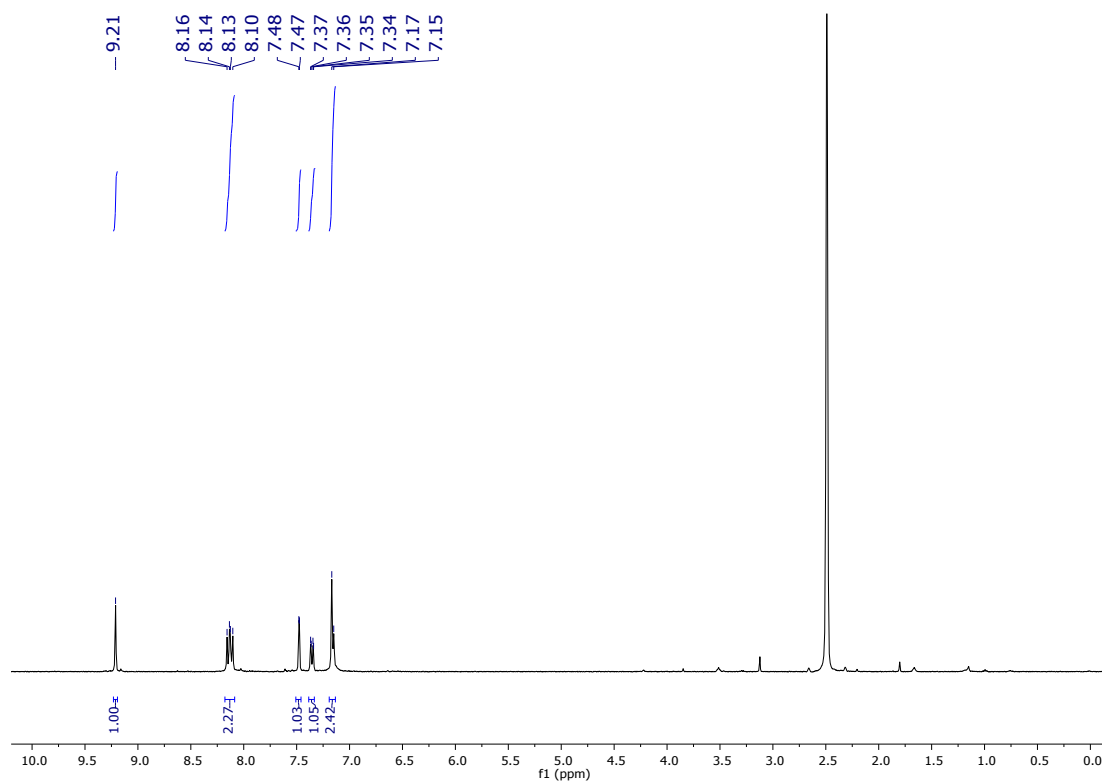

Figure S1. <sup>1</sup>H NMR of compound 4 in DMSO:TFA-*d*<sub>1</sub> (4:1)

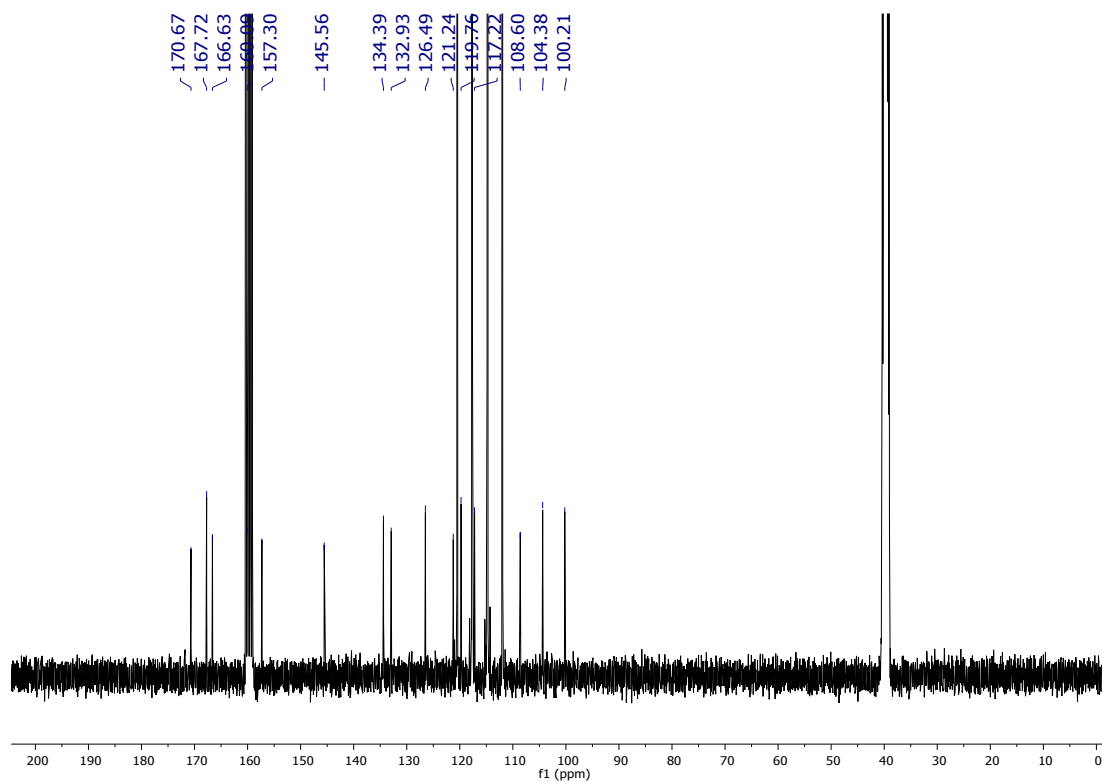

Figure S2. <sup>13</sup>C NMR of compound 4 in DMSO:TFA-*d*<sub>1</sub> (4:1)

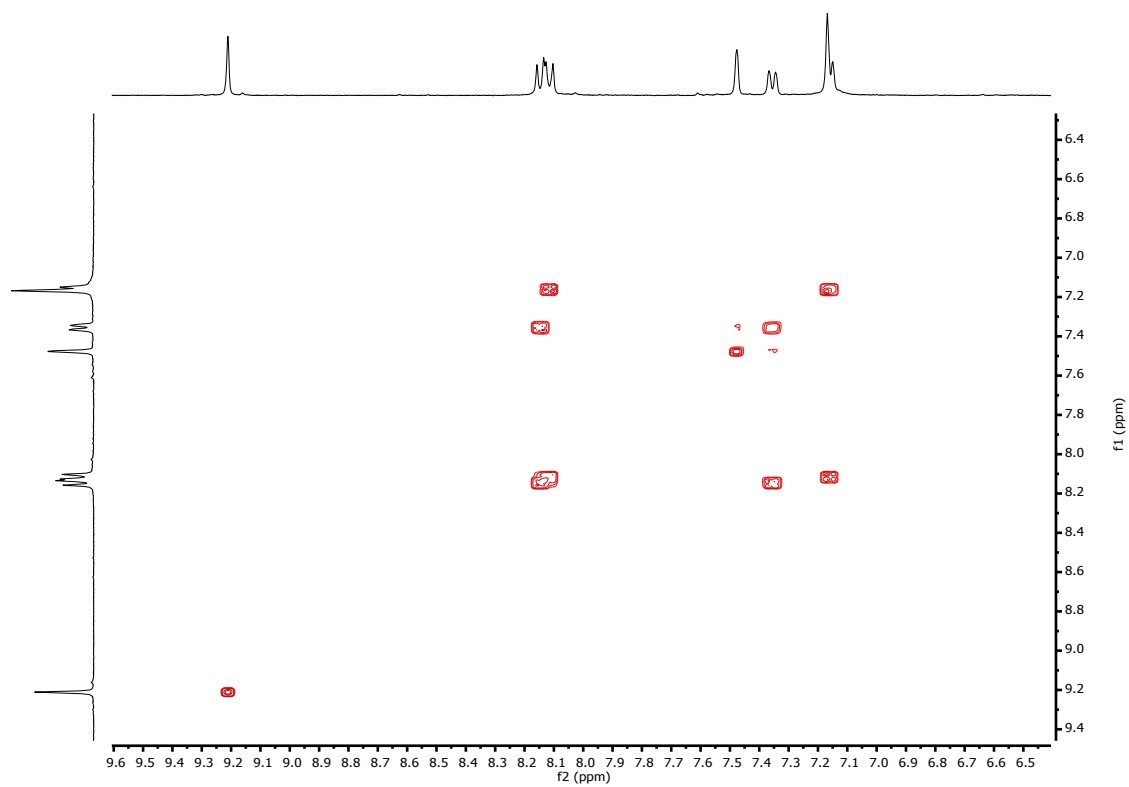

**Figure S3.**  $^1\text{H}$ - $^1\text{H}$ -COSY of compound **4** in DMSO:TFA- $d_1$  (4:1)

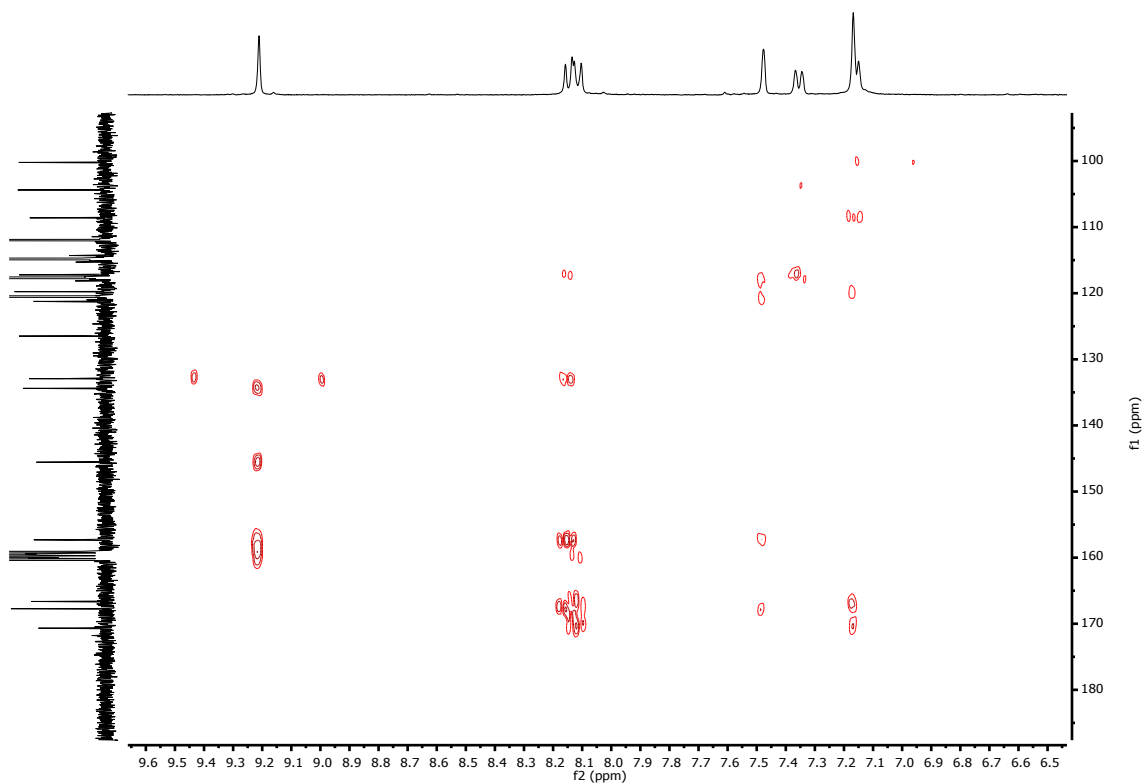

**Figure S4.**  $^1\text{H}$ - $^{13}\text{C}$ -HMBC of compound **4** in DMSO:TFA- $d_1$  (4:1)

Table S1 – <sup>1</sup>H-NMR and <sup>13</sup>C-NMR full peak assignment of compound **4** in DMSO:TFA-*d*<sub>1</sub> (4:1)

| 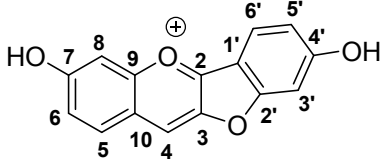 |                                                                            |                                                                      |                                                  |                                               |
|------------------------------------------------------------------------------------|----------------------------------------------------------------------------|----------------------------------------------------------------------|--------------------------------------------------|-----------------------------------------------|
| Position                                                                           | <sup>1</sup> H<br>δ/ppm (J/Hz)<br>DMSO:TFA- <i>d</i> <sub>1</sub><br>(4:1) | <sup>13</sup> C<br>δ/ppm<br>DMSO:TFA- <i>d</i> <sub>1</sub><br>(4:1) | HMBC<br>DMSO:TFA- <i>d</i> <sub>1</sub><br>(4:1) | COSY<br>DMSO:TFA- <i>d</i> <sub>1</sub> (4:1) |
| 1                                                                                  | -                                                                          | -                                                                    | -                                                | -                                             |
| 2                                                                                  | -                                                                          | 160.1                                                                | 4, 6'                                            | -                                             |
| 3                                                                                  | -                                                                          | 145.6                                                                | 4                                                | -                                             |
| 4                                                                                  | 9.21 ( <i>s</i> )                                                          | 132.9                                                                | 2, 3, 5, 9                                       | -                                             |
| 5                                                                                  | 8.15 ( <i>d</i> , 9.0)                                                     | 139.4                                                                | 4, 7, 9                                          | 6                                             |
| 6                                                                                  | 7.35 ( <i>dd</i> , 9.0, 2.2)                                               | 121.2                                                                | 8, 10                                            | 5, 8                                          |
| 7                                                                                  | -                                                                          | 167.7                                                                | 5, 8                                             | -                                             |
| 8                                                                                  | 7.48 ( <i>d</i> , 2.2)                                                     | 104.4                                                                | 6, 10                                            | 6                                             |
| 9                                                                                  | -                                                                          | 157.3                                                                | 4, 5, 8                                          | -                                             |
| 10                                                                                 | -                                                                          | 117.2                                                                | 6, 8                                             | -                                             |
| 1'                                                                                 | -                                                                          | 108.6                                                                | 3', 5'                                           | -                                             |
| 2'                                                                                 | -                                                                          | 166.3*                                                               | 3', 6'                                           | -                                             |
| 3'                                                                                 | 7.17 ( <i>ov</i> )                                                         | 100.2                                                                | 1', 2', 4', 5'                                   | 5'                                            |
| 4'                                                                                 | -                                                                          | 170.7*                                                               | 3', 6'                                           | -                                             |
| 5'                                                                                 | 7.17 ( <i>ov</i> )                                                         | 119.8                                                                | 1', 3'                                           | 3', 6'                                        |
| 6'                                                                                 | 8.12 ( <i>d</i> , 9.1)                                                     | 126.5                                                                | 2, 2', 4'                                        | 5'                                            |

\*these signals may be interchangeables.
